# Supplementary material for: Serious Games for Seismic Risk Education: The Case of the ENP-CP Project
Source: MDPI journal article supplement (doi:10.3390/geohazards5020016), 2024-04-08
Supplement: s1 [file s1]

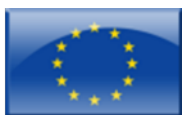

Financed by the  
European Union

# ENP-CP European Neighbourhood Policy Civil Protection Project

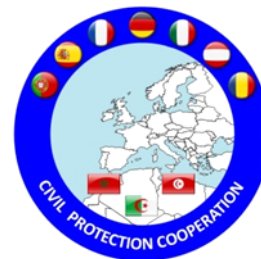

## STUDENT QUESTIONNAIRE

1. Class \_\_\_\_\_
2. Have you ever attended a risk education activity or gaming?  
☐ Yes ☐ No
3. Have you ever done earthquake drills in your school?  
☐ Yes ☐ No
4. Score the games that you played today with us.  
(5 is if you liked it a lot)

| Game name                 | Scores |   |   |   |   |
|---------------------------|--------|---|---|---|---|
| Catch the Plate – digital | 1      | 2 | 3 | 4 | 5 |
| Make your room safer      | 1      | 2 | 3 | 4 | 5 |
| The emergency bag         | 1      | 2 | 3 | 4 | 5 |

5. Do you prefer group games or two-person games?  
☐ Single-player games  
☐ Small group-player games  
☐ Group games where the group consists of all classmates.
6. Do you like competitive or collaborative games?  
☐ I prefer competitive games.  
☐ I prefer games where players collaborate to reach the same goal.
7. Do you like computer or paper games?  
☐ I prefer computer games.  
☐ I prefer paper games.  
☐ I like both.
8. Do you think that the short presentation before each game was useful?  
☐ Yes ☐ No
9. Do you think that speaking two different languages was an obstacle?  
☐ Yes ☐ No



Financed by the  
European Union

## ENP-CP European Neighbourhood Policy Civil Protection Project



10. What did you learn from the game "Catch the plate - digital?"

---

---

11. What did you learn from the game "Make your room safer"?

---

---

12. What did you learn from the game "Emergency bag"?

---

---

13. Match each game and its objective:

| Objective                                            | Catch the Plate - digital | Make your room safer | The emergency bag |
|------------------------------------------------------|---------------------------|----------------------|-------------------|
| Understand how to get prepared for an emergency      |                           |                      |                   |
| Understand what to do to prevent damage              |                           |                      |                   |
| Understand how to live with the earthquake hazard    |                           |                      |                   |
| Understand the meaning of hazard, exposure, and risk |                           |                      |                   |
| Understand what to do in case of an earthquake       |                           |                      |                   |

14. What did you like the most?

---

15. What did you like the least?

---

16. Would you play with us again?

☐ Yes      ☐ No



Financed by the  
European Union

# ENP-CP European Neighbourhood Policy Civil Protection Project



## TEACHER QUESTIONNAIRE

1. Country \_\_\_\_\_
2. Event \_\_\_\_\_
3. Class \_\_\_\_\_
4. Have you ever attended international exchange events?  
in this school in other schools  
Yes ☐ ☐  
No ☐ ☐
5. If yes, were they hybrid (in presence and remotely) events?  
☐ Yes ☐ No ☐ Other
6. Have you ever attended a risk education activity at school?  
☐ Yes ☐ No
7. How much do you think students were engaged in the activities?  
Not very engaged 

|   |   |   |   |   |
|---|---|---|---|---|
| 1 | 2 | 3 | 4 | 5 |
|---|---|---|---|---|

 Highly engaged
8. Was it useful delivering a short introduction before each game?  
☐ Yes ☐ No
9. What do you think about addressing both the phenomenon, prevention and preparedness?  
☐ It's preferable to deal with the three topics at once to provide a comprehensive approach to Disaster Risk Management  
☐ It's better to focus only on one topic at the time
10. Serious games were designed to stimulate collaboration rather than competition. What do you think about?

---

---



Financed by the  
European Union

# ENP-CP

## European Neighbourhood Policy

### Civil Protection Project



#### 11. Please, rate the following attributes of the games.

*By effective is meant that the key message was received*

*By interesting is meant that the game triggered students' interest*

*By useful is meant that it is in line with the didactic objective or able to develop citizenship's skills*

#### Catch the Plate - digital

| Attribute             | (Less) (More) |   |   |   |   |
|-----------------------|---------------|---|---|---|---|
| Effective             | 1             | 2 | 3 | 4 | 5 |
| Interesting           | 1             | 2 | 3 | 4 | 5 |
| Useful                | 1             | 2 | 3 | 4 | 5 |
| Educational           | 1             | 2 | 3 | 4 | 5 |
| Suitable for teaching | 1             | 2 | 3 | 4 | 5 |
| Interactive           | 1             | 2 | 3 | 4 | 5 |

Please, leave us a comment \_\_\_\_\_

#### Make your room safer

| Attribute             | (Less) (More) |   |   |   |   |
|-----------------------|---------------|---|---|---|---|
| Effective             | 1             | 2 | 3 | 4 | 5 |
| Interesting           | 1             | 2 | 3 | 4 | 5 |
| Useful                | 1             | 2 | 3 | 4 | 5 |
| Educational           | 1             | 2 | 3 | 4 | 5 |
| Suitable for teaching | 1             | 2 | 3 | 4 | 5 |
| Interactive           | 1             | 2 | 3 | 4 | 5 |

Please, leave us a comment \_\_\_\_\_

#### Emergency bag

| Attribute             | (Less) (More) |   |   |   |   |
|-----------------------|---------------|---|---|---|---|
| Effective             | 1             | 2 | 3 | 4 | 5 |
| Interesting           | 1             | 2 | 3 | 4 | 5 |
| Useful                | 1             | 2 | 3 | 4 | 5 |
| Educational           | 1             | 2 | 3 | 4 | 5 |
| Suitable for teaching | 1             | 2 | 3 | 4 | 5 |
| Interactive           | 1             | 2 | 3 | 4 | 5 |

Please, leave us a comment \_\_\_\_\_

#### 12. What do you think about the duration of the event?

Too short 

|   |   |   |   |   |
|---|---|---|---|---|
| 1 | 2 | 3 | 4 | 5 |
|---|---|---|---|---|

 Too long

#### 13. What do you think is the added value of these events for the students?

---



---

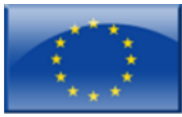

Financed by the  
European Union

## ENP-CP European Neighbourhood Policy Civil Protection Project

---

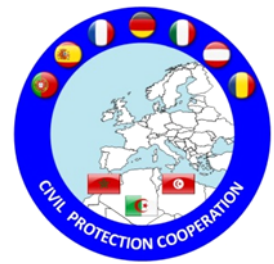

14. And for the teachers?

---

---

15. What do you suggest changing or improve in the event and/or in the games?

---

---

16. Do you have suggestions on how to build a roadmap to provide skills for life on risk management to students?

---

---

17. Could it be useful to implement activities to continue a shared path with other countries' schools on risk management?

---

---

18. Would you repeat the experience with another class next year?

☐ Yes      ☐ No
